# Supplementary material for: Tunable valley splitting and an anomalous valley Hall effect in hole-doped WS2 by proximity coupling with a ferromagnetic MnO2 monolayer
Source: Royal Society of Chemistry journal article supplement (doi:10.1039/c9nr03315g), 2019-01-01
Supplement: c9nr03315g1.pdf [file c9nr03315g1.pdf]

## Supplementary Information

### **Tunable Valley splitting and Anomalous Valley Hall Effect in Hole-doped WS<sub>2</sub> by Proximity Coupling with Ferromagnetic MnO<sub>2</sub> monolayer**

Baozeng Zhou<sup>1,\*</sup>, Zheng Li<sup>1</sup>, Jiaming Wang<sup>1</sup>, Xuechen Niu<sup>1</sup>, Chongbiao Luan<sup>2</sup>

<sup>1</sup>Tianjin Key Laboratory of Film Electronic & Communicate Devices, School of Electrical and Electronic Engineering, Tianjin University of Technology, Tianjin 300384, China

<sup>2</sup>Institute of Fluid Physics, China Academy of Engineering Physics, Mianyang, Sichuan 621999, China

---

\*Author to whom all correspondence should be addressed.

E-mail: [baozeng@tju.edu.cn](mailto:baozeng@tju.edu.cn)

**Table S1.** The calculated lattice constant  $a$ , interfacial distance  $d$  (Å), binding energy  $E_b$  (eV), magnetic moments  $M$  ( $\mu_B$ ) of WS<sub>2</sub> and MnO<sub>2</sub> layers, and valley splitting ( $\Delta_{KK'}$ ) of the heterostructures with different stacking configurations.

|                         | Fcc-I | Fcc-II | Hcp-I | Hcp-II | Top-I | Top-II |
|-------------------------|-------|--------|-------|--------|-------|--------|
| $a$ (Å)                 | 3.08  | 3.09   | 3.06  | 3.06   | 3.09  | 3.07   |
| $d$ (Å)                 | 2.74  | 2.71   | 2.77  | 2.76   | 3.19  | 3.24   |
| $E_b$ (eV)              | -1.26 | -1.35  | -1.26 | -1.28  | -1.20 | -1.21  |
| $M$ (WS <sub>2</sub> )  | 0.058 | 0.065  | 0.055 | 0.055  | 0.023 | 0.025  |
| $M$ (MnO <sub>2</sub> ) | 3.023 | 3.031  | 3.016 | 3.014  | 3.007 | 3.011  |
| $\Delta_{KK'}$          | 17    | 43     | 35    | 39     | 21    | 15     |

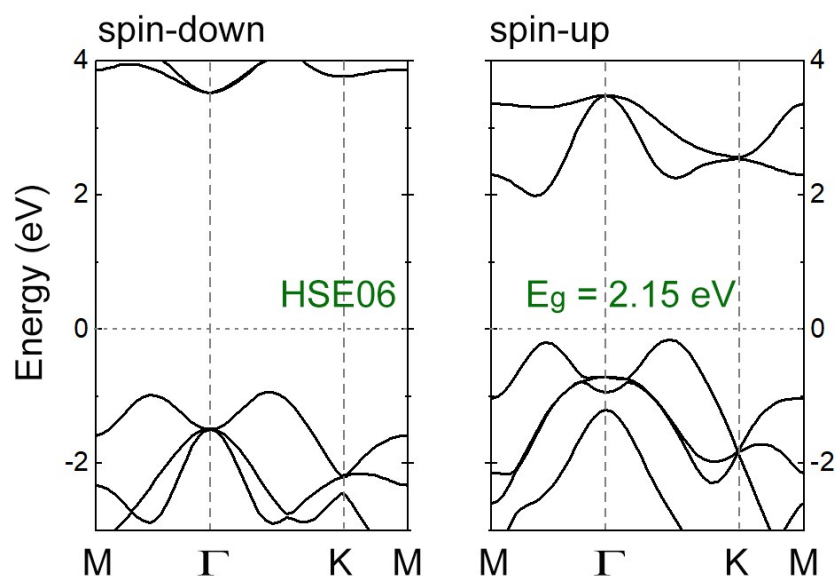

**Fig. S1.** Calculated band structure of pristine 2D MnO<sub>2</sub> by HSE06 method. The Fermi levels are set to zero.

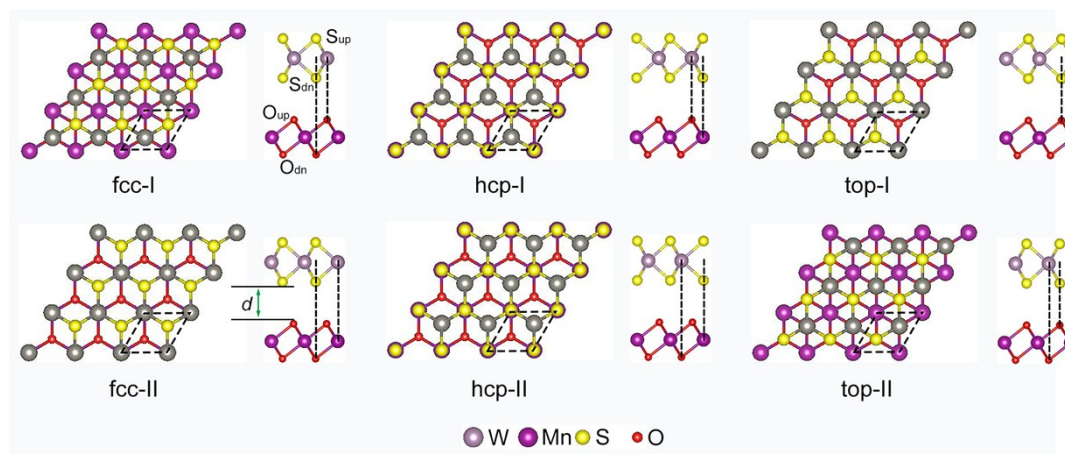

**Fig. S2.** Top and side views of  $\text{WS}_2/\text{MnO}_2$  heterostructures with various stacking configurations.

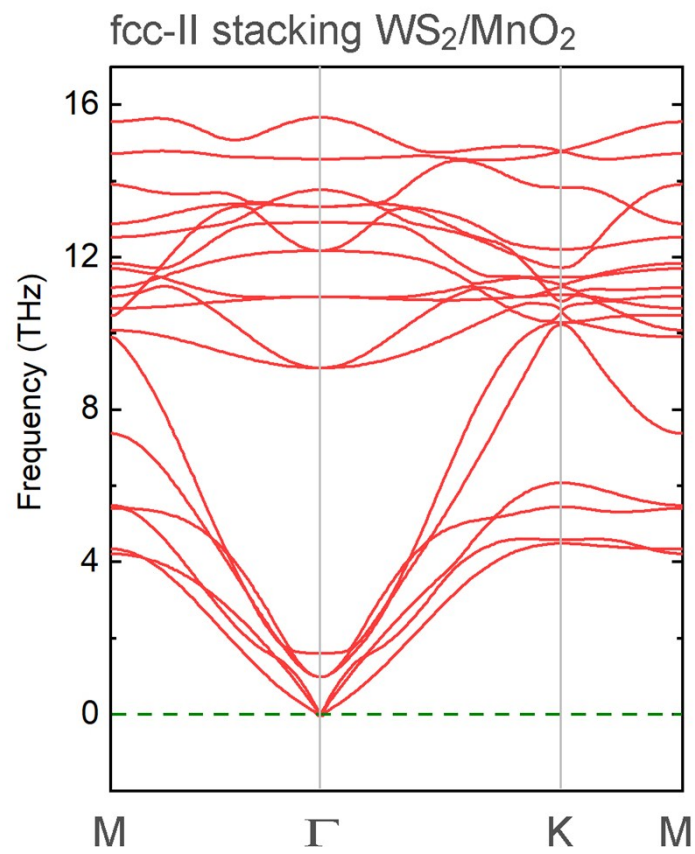

**Fig. S3.** Phonon bands of  $\text{WS}_2/\text{MnO}_2$  heterostructure with fcc-II stacking model.

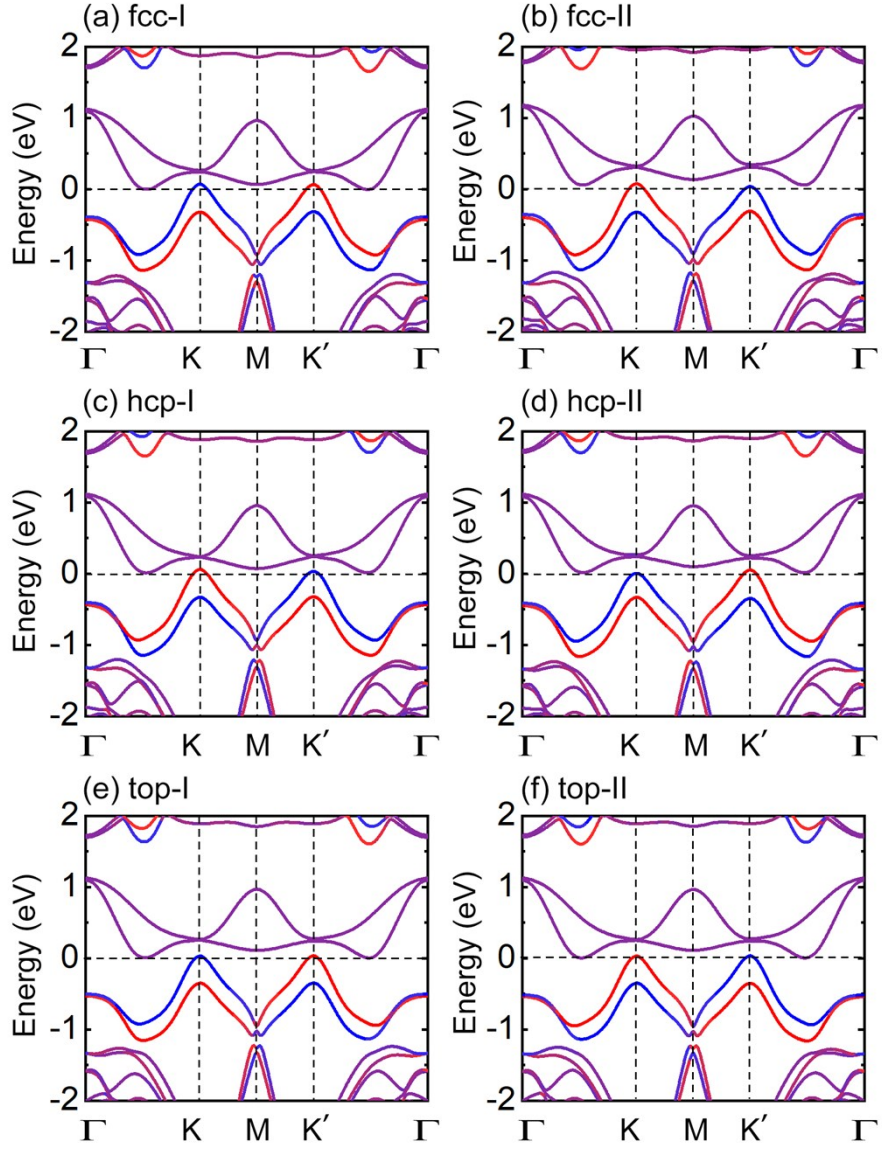

**Fig. S4.** Calculated band structures of the six configurations of  $\text{WS}_2/\text{MnO}_2$  heterostructures. The spin projections for the  $\text{WS}_2$  along  $z$  direction are represented by red and blue lines, which represent the spin-up and spin-down states, respectively. The Fermi level is set to zero.

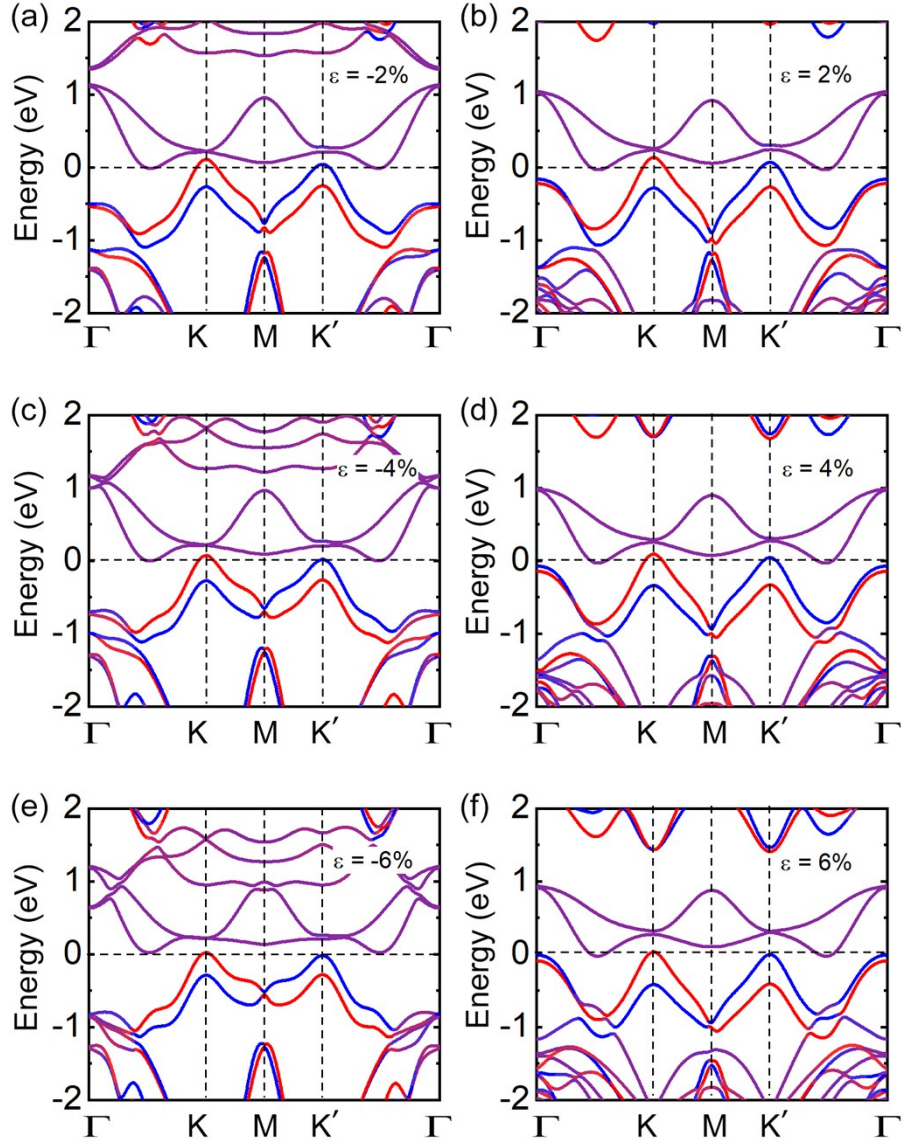

**Fig. S5.** Calculated band structures of fcc-II stacking  $\text{WS}_2/\text{MnO}_2$  with various in-plane biaxial strain.
